# Supplementary material for: In-situ observations of flux growth of NaTaO3 crystals on tantalum substrate
Source: Royal Society of Chemistry journal article supplement (doi:10.1039/c3ce40330k), 2013-01-01
Supplement: c3ce40330k.pdf [file c3ce40330k.pdf]

## Electronic supplementary information

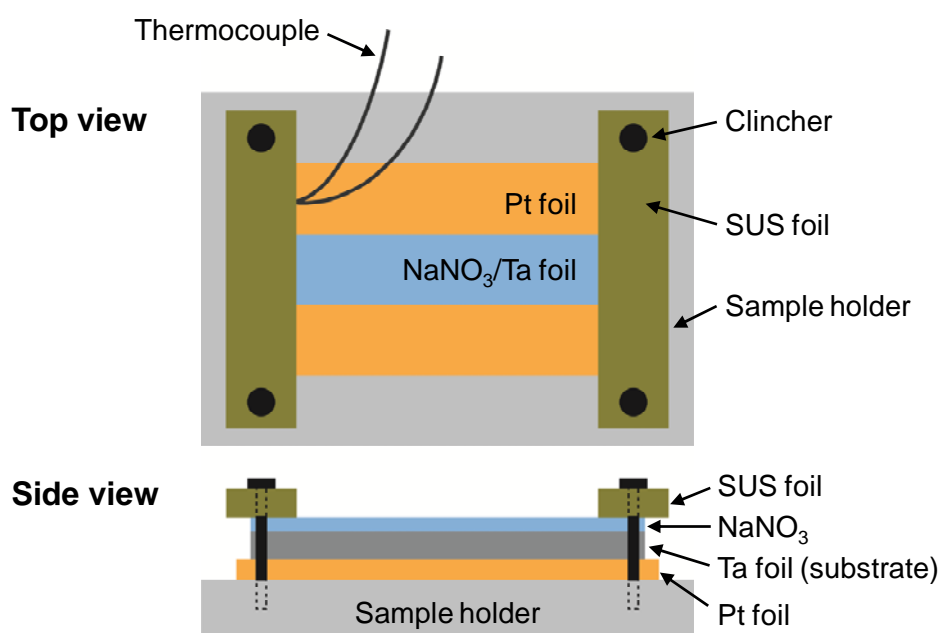

5

**ESI 1** Schematic illustration of NaNO<sub>3</sub>-coated Ta substrate on sample holder used for *in-situ* LM observation.

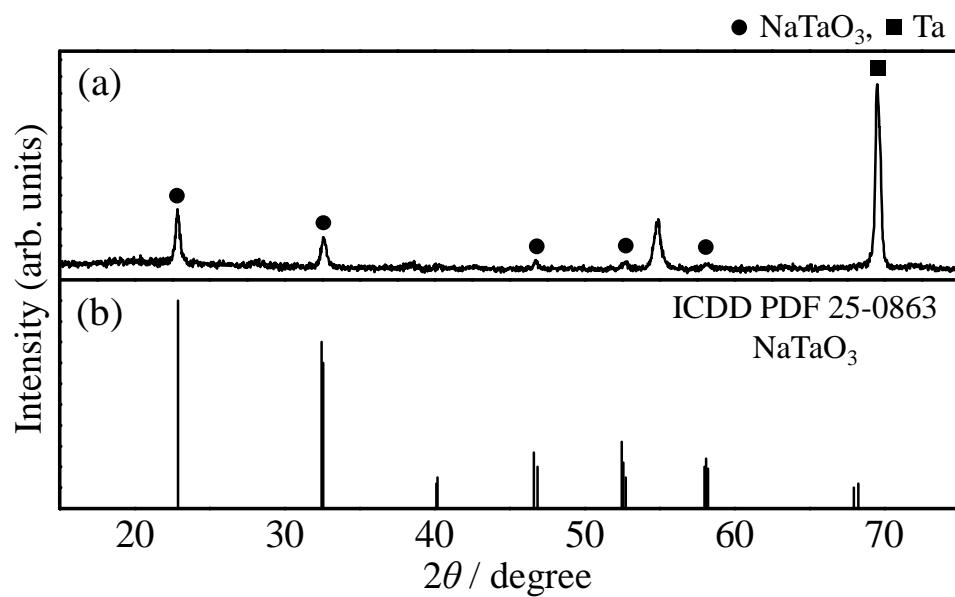

5

**ESI 2** XRD profiles for (a) crystals grown on Ta substrate during *in-situ* LM observation and for (b) NaTaO<sub>3</sub> ICDD PDF. Diffraction line at  $2\theta = 55.6^\circ$  seems to be assigned to Ta-O system, as shown in previous report.<sup>18</sup>
